# Supplementary material for: Innate immune activation by checkpoint inhibition in human patient-derived lung cancer tissues
Source: eLife journal article supplement (doi:10.7554/elife.69578), 2021-08-18
Supplement: supp [file elife-69578-supp-v2.zip]

## Supplementary file 2

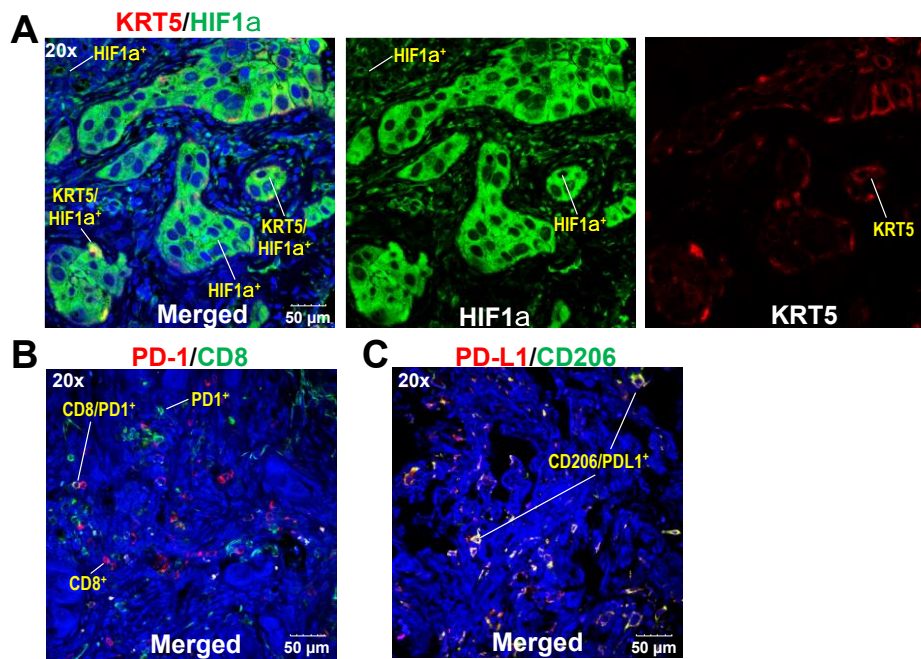

**Fig. S1. Primary NSCLC tissue of UK131 patient stains positive for squamous cell carcinoma marker, PD-1 and PD-L1.** Freshly resected CA lung tissue of UK131 was FFPE-processed, sectioned as 4 μm slices, stained for KRT5 (squamous cell carcinoma marker)/HIF1α in **A**, PD-1/CD8 in **B**, and PD-L1/CD206 in **C**, and analyzed by confocal microscopy as described in the Experimental.
