# Supplementary material for: Innate immune activation by checkpoint inhibition in human patient-derived lung cancer tissues
Source: eLife journal article supplement (doi:10.7554/elife.69578), 2021-08-18
Supplement: supp [file elife_poa_e69578_Figure_1_figure_supplement_1.docx]

**Figure 1- figure supplement 1**
